# Supplementary material for: From Transgenesis to Genome Editing in Crop Improvement: Applications, Marketing, and Legal Issues
Source: MDPI journal article supplement (doi:10.3390/ijms24087122), 2023-04-12
Supplement: s1 [file s1]

Table S1. Crops improved through transgenic, cis/intragenic and GE approaches evaluated in field trials.

| Trait                       | Crop            | Gene                           | Source                      | Effect on gene expression | Effect/Phenotype                                       | References |
|-----------------------------|-----------------|--------------------------------|-----------------------------|---------------------------|--------------------------------------------------------|------------|
| <b>Transgenic approach</b>  |                 |                                |                             |                           |                                                        |            |
| <b>Herbicide-resistance</b> | Pineapple       | <i>bar</i>                     | <i>S. hygroscopicus</i>     | Expression                | Enhanced tolerance to Glufosinate ammonium             | [15]       |
| <b>Abiotic stresses</b>     | Wheat           | <i>Hahb-4</i>                  | <i>H. annuus</i>            | Overexpression            | Enhanced drought tolerance                             | [19]       |
|                             | Tomato          | <i>cAPX</i>                    | Pea                         | Overexpression            | Enhanced tolerance to heat, UV-B and sunscald stresses | [16]       |
|                             | Chinese cabbage | <i>HTT2</i>                    | Arabidopsis                 | Overexpression            | Enhanced resistance to heat                            | [17]       |
|                             | Soybean         | <i>GmMYB14</i>                 | Soybean cultivar Tianlon    | Overexpression            | Enhanced drought tolerance                             | [18]       |
| <b>Biotic stress</b>        | Rice            | <i>cry1Ab</i>                  | <i>Bt</i>                   | Expression                | Stem borer resistance                                  | [26]       |
|                             | Rice            | <i>Xa21</i>                    | Wild <i>Solanum</i> species | Overexpression            | Bacterial blight resistance                            | [25]       |
|                             | Potato          | <i>Rpi-vnt1.1</i>              | <i>S. venturii</i>          | Expression                | Late blight resistance                                 | [32]       |
|                             | Potato          | <i>Rpi genes</i>               | Wild <i>Solanum</i> species | Expression                | Late blight resistance                                 | [33,34]    |
|                             | Sugarcane       | <i>Cry1Ab</i> and <i>EPSPS</i> | <i>Bt/-</i>                 | Expression                | Cane borer resistance and glyphosate tolerance         | [28]       |
|                             | Sugarcane       | <i>CP</i>                      | SCMV                        | Expression                | SCMV strain E resistance                               | [29]       |
|                             | Sugarcane       | <i>CP</i>                      | SCYLV                       | Expression                | SCYLV resistance                                       | [30]       |
|                             | Sugarcane       | <i>CP</i>                      | SCMV                        | Expression                | Lower SCMV disease incidence                           | [31]       |
|                             | Papaya          | <i>RP</i>                      | PRSV                        | Expression                | High resistance or immunity against PRSV               | [23]       |
|                             | Sweet orange    | <i>NPRI</i>                    | Arabidopsis                 | Overexpression            | Enhanced Resistance against Huanglongbing              | [24]       |
|                             |                 |                                |                             |                           |                                                        |            |

|                                |                                |                                                     |                                                          |                                         |                                                            |                   |
|--------------------------------|--------------------------------|-----------------------------------------------------|----------------------------------------------------------|-----------------------------------------|------------------------------------------------------------|-------------------|
| <b>Quality trait</b>           | Wheat                          | <i>Wrinkled1a</i><br><i>DGATI</i><br><i>Oleosin</i> | Maize<br>Arabidopsis<br>Sesame                           | Endosperm<br>specific<br>overexpression | Increased triacylglyceride levels                          | [38]              |
|                                | Barley                         | <i>CKX</i>                                          | Arabidopsis                                              | Root-specific<br>expression             | Increased concentration of Zn in grains                    | [40]              |
|                                | Soybean                        | <i>GmFAD2-1B</i>                                    | Soybean                                                  | RNAi-mediated<br>silencing              | Improved oil quality                                       | [35]              |
|                                | Purple-fleshed<br>sweet potato | <i>IbOr-Ins</i>                                     | Sweet potato                                             | Overexpression                          | Increased anthocyanins and carotenoids in<br>storage roots | [36]              |
|                                | Tomato                         | <i>PG</i>                                           | Tomato                                                   | RNAi-mediated<br>silencing              | Improved shelf-life                                        | [41]              |
|                                | Canola                         | <i>DGATI</i>                                        | Arabidopsis and<br><i>B. napus</i>                       | Seed specific<br>overexpression         | Increased seed oil content                                 | [39]              |
| <b>Cis/intragenic approach</b> |                                |                                                     |                                                          |                                         |                                                            |                   |
| <i>Cisgenesis</i>              |                                |                                                     |                                                          |                                         |                                                            |                   |
| <b>Biotic stress</b>           | Potato                         | <i>Rpi</i>                                          | Wild <i>Solanum</i><br>species                           | Expression                              | Late blight resistance                                     | [52-54]           |
|                                | Apple                          | <i>HcrVf1</i> and <i>HcrVf2</i>                     | Gene's own                                               | Expression                              | Scab resistance                                            | [57,58]           |
| <b>Quality trait</b>           | Barley                         | <i>HvPAPhy a</i>                                    | Gene's own                                               | Overexpression                          | Improved grain phytase activity                            | [50]              |
| <i>Intragenesis</i>            |                                |                                                     |                                                          |                                         |                                                            |                   |
| <b>Biotic stress</b>           | Apple                          | <i>HcrVf1</i> and <i>HcrVf2</i>                     | Own gene with<br>different<br>promoter and<br>terminator | Overexpression                          | Scab resistance                                            | [57]              |
| <b>Quality trait</b>           | Potato                         | <i>GBSS</i>                                         | Gene's own                                               | Silencing                               | High-amylopectin                                           | [56]              |
|                                | Potato                         | <i>StAst1</i>                                       | Gene's own                                               | Silencing                               | Reduced acrylamide level in French Fries                   | [55]              |
| <b>Genome Editing approach</b> |                                |                                                     |                                                          |                                         |                                                            |                   |
| <b>Trait</b>                   | <b>Crop</b>                    | <b>Gene/s</b>                                       | <b>Technology</b>                                        | <b>Effect on gene<br/>expression</b>    | <b>Effect/Phenotype</b>                                    | <b>References</b> |

|                                   |          |                                                                |             |           |                                                                                                             |         |
|-----------------------------------|----------|----------------------------------------------------------------|-------------|-----------|-------------------------------------------------------------------------------------------------------------|---------|
| <b>Yield/Yield related traits</b> | Rice     | <i>Gn1a, DEPI, GS3 and IPA1</i>                                | CRISPR/Cas9 | Knock-out | Improved yield-related traits                                                                               | [63]    |
|                                   | Rice     | <i>BADH2, DEPI, Gn1a, QTL-GS3, QTL-GW2, Hd1, EP3, and LPA1</i> | CRISPR/Cas9 | Knock-out | Improved yield-related traits                                                                               | [64]    |
|                                   | Rice     | <i>OsGS3, OsGW2 and OsGn1a</i>                                 | CRISPR/Cas9 | Knock-out | Improved yield-related traits                                                                               | [65]    |
|                                   | Rice     | <i>SD1</i>                                                     | CRISPR/Cas9 | Knock-out | Improved yield for plant height reduction                                                                   | [66]    |
|                                   | Rice     | <i>TaARE1</i>                                                  | CRISPR/Cas9 | Knock-out | Improved yield for enhanced tolerance to N starvation and delayed senescence                                | [67]    |
|                                   | Maize    | <i>ARGOS8</i>                                                  | CRISPR/Cas9 | Knock-out | Improved drought tolerance and yield                                                                        | [68]    |
| <b>Abiotic stress</b>             | Rice     | <i>OsRR22</i>                                                  | CRISPR/Cas9 | Knock-out | Improved salt stress tolerance                                                                              | [69]    |
| <b>Biotic stress</b>              | Rice     | <i>OsSWEET14</i>                                               | CRISPR/Cas9 | Knock-out | Enhanced bacterial blight resistance                                                                        | [71]    |
|                                   |          | <i>ERF922</i>                                                  | CRISPR/Cas9 | Knock-out | Enhanced rice blast resistance                                                                              | [73]    |
|                                   |          | <i>Bsr-d1, Pi21 and ERF922</i>                                 | CRISPR/Cas9 | Knock-out | Enhanced rice blast and bacterial blight resistance                                                         | [72]    |
| <b>Quality trait</b>              | Wheat    | <i>TaASN2</i>                                                  | CRISPR/Cas9 | Knock-out | Decreased asparagine content                                                                                | [80]    |
|                                   | Rice     | <i>OsNramp5</i>                                                | CRISPR/Cas9 | Knock-out | Low Cd accumulation                                                                                         | [75,76] |
|                                   | Rice     | <i>OsNramp5 and OsLCT1</i>                                     | CRISPR/Cas9 | Knock-out | Low Cd accumulation                                                                                         | [77]    |
|                                   | Rice     | <i>OsHAK1</i>                                                  | CRISPR/Cas9 | Knock-out | Reduced Cs <sup>+</sup> uptake in conditions favoring high radiocesium uptake                               | [78]    |
|                                   | Maize    | <i>waxy</i>                                                    | CRISPR/Cas9 | Knock-out | Modified starch composition and improved yield                                                              | [74]    |
|                                   | Canola   | <i>MYB28</i>                                                   | CRISPR/Cas9 | Knock-out | Downregulation of <i>A-GSL</i> biosynthesis genes and reduction in accumulation of different glucosinolates | [79]    |
|                                   | Camelina | <i>FAD2</i>                                                    | CRISPR/Cas9 | Knock-out | Increased seed oleic acid content                                                                           | [81]    |

|  |                     |             |             |           |                            |      |
|--|---------------------|-------------|-------------|-----------|----------------------------|------|
|  | Canola and Camelina | <i>BADC</i> | CRISPR/Cas9 | Knock-out | Increased seed oil content | [82] |
|--|---------------------|-------------|-------------|-----------|----------------------------|------|

*Genes: Ast1=asparagine synthetase (Ast)-1; ASNS=asparagine synthetase; BADC= biotin/lipoyl attachment domain containing; BADH2=betaine aldehyde dehydrogenase; Bar=phosphinothricin acetyltransferase; cAPX=cytosolic ascorbate peroxidase; CP, coat protein; CKX=cytokinin oxidases/dehydrogenase; EP3=ERECT PANICLE; DEPI=dense and erect panicle 1; DGAT1= diacylglycerol acyl transferase 1; FAD2-1B=Delta-12 fatty acid desaturase 2 (FAD2); GBSS=granule bound starch synthase gene; Gn1a=grain number; GS3=QTL for grain length and weight; GW2=major QTL associated with rice grain width and weight; HAK1=Cs<sup>+</sup>- permeable K<sup>+</sup> transporter; Hd1=heading date 1; HTT2=HEAT-INDUCED TASI TARGET2; LCT1=low affinity cation transporter 1; IbOr=Ipomoea batatas Orange gene; LPA1=loose plant architecture 1; NPR1=Pathogenesis Related genes 1; PG=Polygalacturonase; PRSV= papaya ring spot virus; RP=replicase; Rpi= Resistance genes against Phytophthora infestans; SD1=Semi-Dwarf1; are1=abnormal cytokinin response1 repressor1; Xa21= receptor-like kinase.*

*Pathogens: Bt=Bacillus thuringensis; PRSV=papaya ring spot virus; SCMV= Sugarcane mosaic virus; SCYLV= Sugarcane yellow leaf virus.*
